# Supplementary material for: Group transfer polymerisation in hydrophobic ionic liquids
Source: Royal Society of Chemistry journal article supplement (doi:10.1039/b415548c), 2005-01-01
Supplement: b415548c.pdf [file b415548c.pdf]

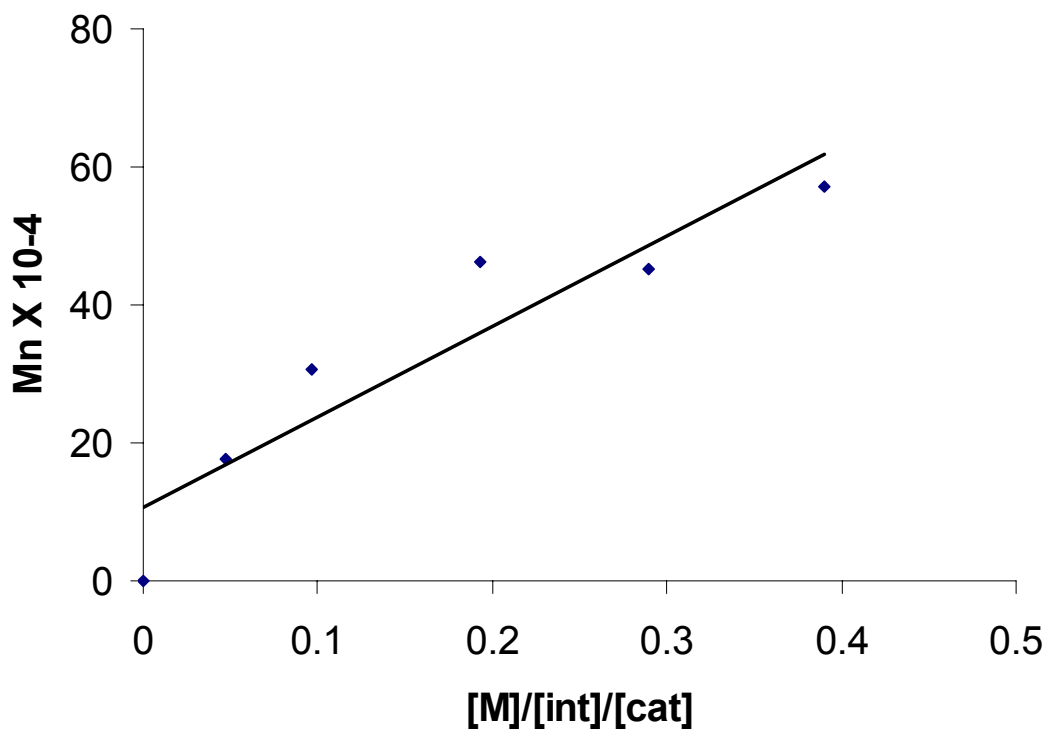

Dependence of Molecular Weight produced (GPC) on the ratio of Monomer to Initiator and Catalyst (after ref 33: D. Baskaran, Prog. Polym. Sci., 2003, 28, 521-581)
